# Supplementary material for: Novel Quinazolinone–Isoxazoline Hybrids: Synthesis, Spectroscopic Characterization, and DFT Mechanistic Study
Source: MDPI journal article supplement (doi:10.3390/chemistry4030066), 2022-08-30
Supplement: s1 [file s1]

Supplementary Information

# Novel Quinazolinone–Isoxazoline Hybrids: Synthesis, Spectroscopic Characterization, and DFT Mechanistic Study

Yassine Rhazi <sup>1</sup>, Mohammed Chalkha <sup>1</sup>, Asmae Nakkabi <sup>1</sup>, Imad Hammoudan <sup>2</sup>, Mohamed Akhazzane <sup>3</sup>, Mohamed Bakhouch <sup>4</sup>, Samir Chtita <sup>5,\*</sup> and Mohamed El Yazidi <sup>1,\*</sup>

<sup>1</sup> Engineering Laboratory of Organometallic and Molecular Materials and Environment, Faculty of Sciences Dhar EL Mahraz, Sidi Mohamed Ben Abdellah University, P.O. Box 1796, 30000 Fez, Morocco

<sup>2</sup> Laboratory physical chemistry, Faculty of Sciences of Tetouan, Abdelmalk Essaadi University, 93002, Tetouan, Morocco

<sup>3</sup> Cité de l'innovation, Université Sidi Mohamed Ben Abdellah, B.P 2626 Route Immouzer, Fez, Morocco

<sup>4</sup> Laboratory of Bioorganic Chemistry, Department of Chemistry, Faculty of Sciences, Chouaib Doukkali University, P.O. Box 24, 24000 El Jadida, Morocco

<sup>5</sup> Laboratory of Analytical and Molecular Chemistry, Faculty of Sciences Ben M'Sik, Hassan II University of Casablanca, B.P. 7955, Casablanca, Morocco

\* Correspondence: samirchtita@gmail.com (S.C.), Tel: +212 660005554; elyazidimohamed@hotmail.com (M.E.Y.), Tel: +212 661488871

## Contents

|                                                                                              |   |
|----------------------------------------------------------------------------------------------|---|
| 1. Chemical reagents and instruments.....                                                    | 3 |
| 2. FT-IR, <sup>1</sup> H, <sup>13</sup> C NMR and HRMS spectra of synthesized compounds..... | 3 |
| i. Quinazolin-4(3H)-one (1) .....                                                            | 3 |
| ii. N-allylquinazolin-4(3H)-one (2) .....                                                    | 4 |
| iii. Hybrid Compounds Containing the Quinazolinone and Isoxazoline Nucleus (4a-h) .....      | 5 |

## 1. Chemical reagents and instruments

All chemicals used were of analytical grade and were purchased from commercial suppliers. The progress of the reactions was monitored by TLC (Merck, silica gel 60 F254), and spots were visualized under UV light (VILBER LOUR-MAT, VL-215.LC). Column chromatography was performed using Merck silica gel (70-230 mesh) and n-hexane/ethyl acetate mixture as eluent. The melting points were determined with an uncertainty of  $\pm 2^\circ\text{C}$  using a KOFLER BENCH. The IR spectra were recorded in the range of  $450\text{--}4000\text{ cm}^{-1}$  on a BRUKER VERTEX 70 FT-IR Spectrometer, and wave-numbers are given in  $\text{cm}^{-1}$ . The NMR spectra ( $^1\text{H}$  and  $^{13}\text{C}$ ) were recorded at room temperature on a BRUKER AVANCE II 300 Ultra-Shield (300 MHz for  $^1\text{H}$  and 75 MHz for  $^{13}\text{C}$ ) spectrometer using  $\text{CDCl}_3$  as solvent. The chemical shifts are expressed in ppm and the coupling constants  $J$  are expressed in Hertz (Hz). The spin multiplicities are reported as singlet (s), doublet (d), triplet (t), multiplet (m), doublet of doublets (dd), doublet of triplets (dt) and broad (br). High-resolution mass spectra were recorded on a Waters/Vion IMS-QTOF: Spectrometer, equipped with an electrospray ionization (ESI), source operating in either positive and negative ion mode.

## 2. FT-IR, $^1\text{H}$ , $^{13}\text{C}$ NMR and HRMS spectra of synthesized compounds

### i. Quinazolin-4(3H)-one (1)

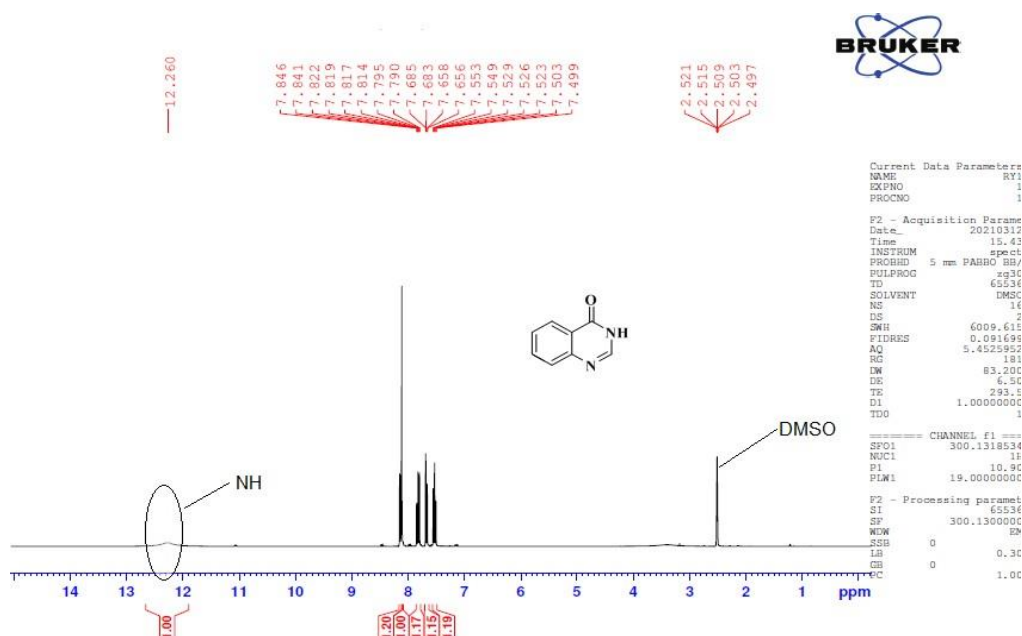

**Figure S1.**  $^1\text{H}$  NMR spectrum (300 MHz, DMSO) of compound (1)

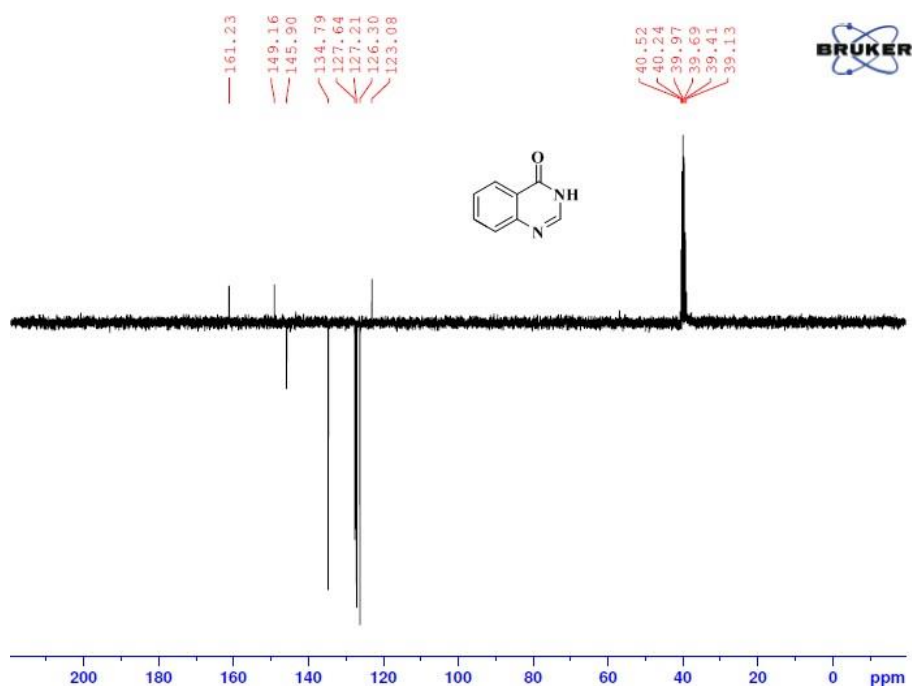

**Figure S2.** <sup>13</sup>C NMR spectrum (75 MHz, DMSO) of compound (1)

ii. N-allylquinazolin-4(3H)-one (2)

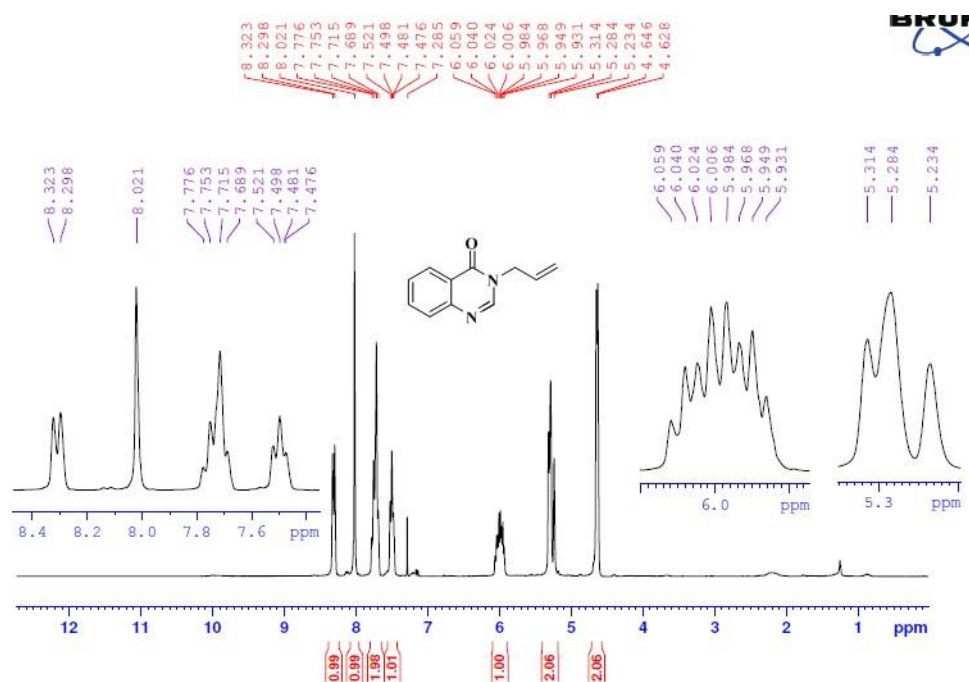

**Figure S3.** <sup>1</sup>H NMR spectrum (300 MHz, CDCl<sub>3</sub>) of compound (2)

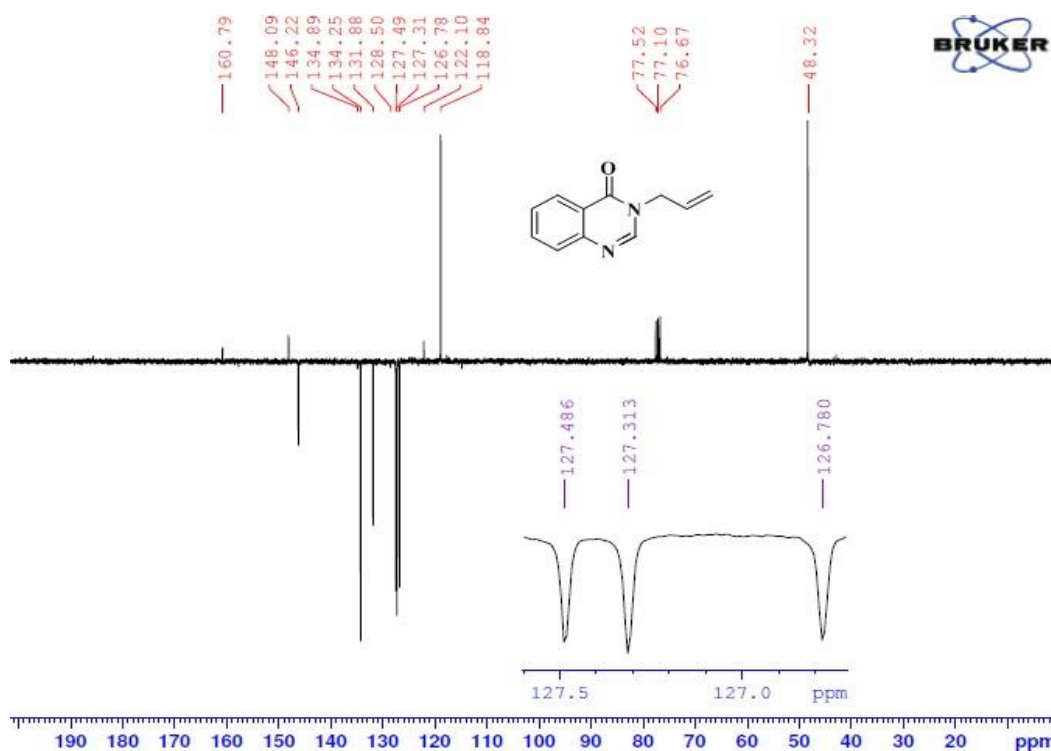

**Figure S4.** <sup>13</sup>C NMR spectrum (75 MHz, CDCl<sub>3</sub>) of compound (2)

### iii. Hybrid Compounds Containing the Quinazolinone and Isoxazoline Nucleus (4a-h)

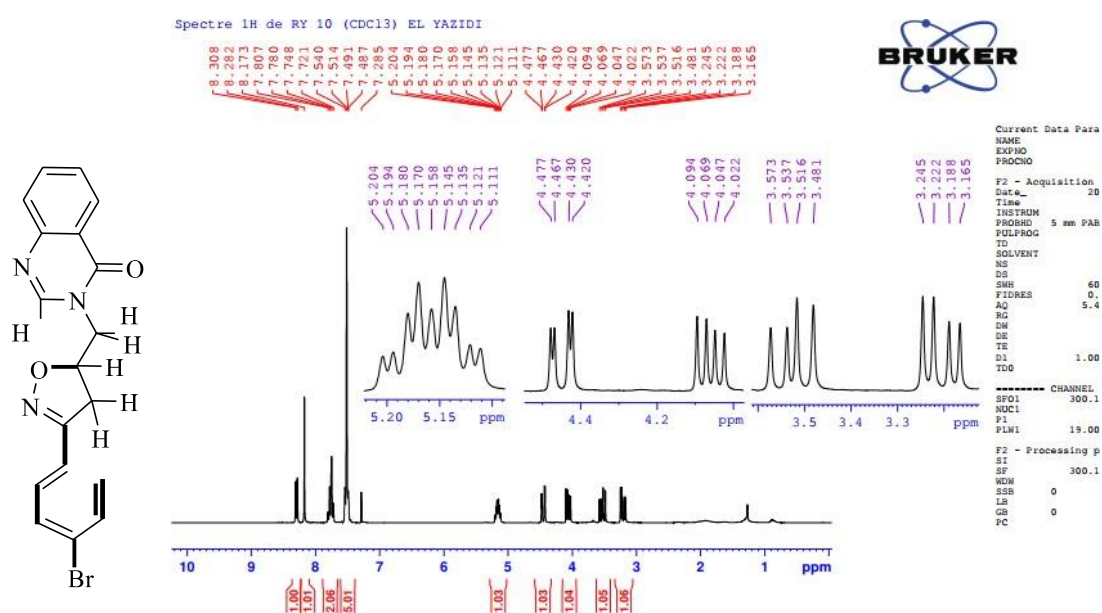

**Figure S5.**  $^1\text{H}$  NMR spectrum (300 MHz,  $\text{CDCl}_3$ ) of compound (4a)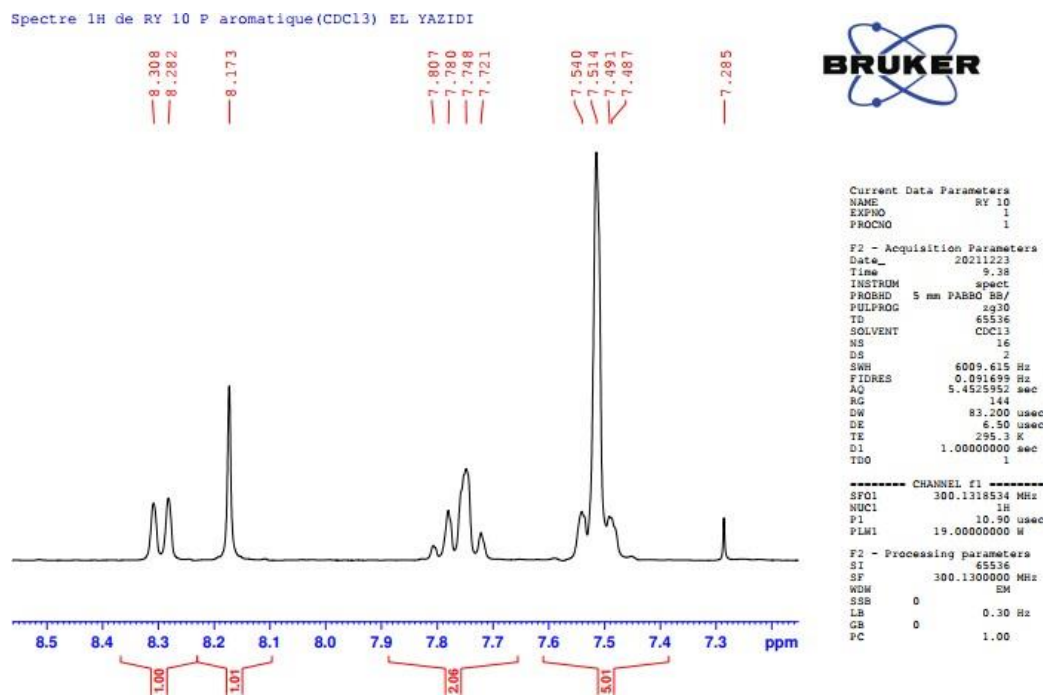**Figure S6.** Aromatic enlarged region of  $^1\text{H}$  NMR spectrum of compound (4a)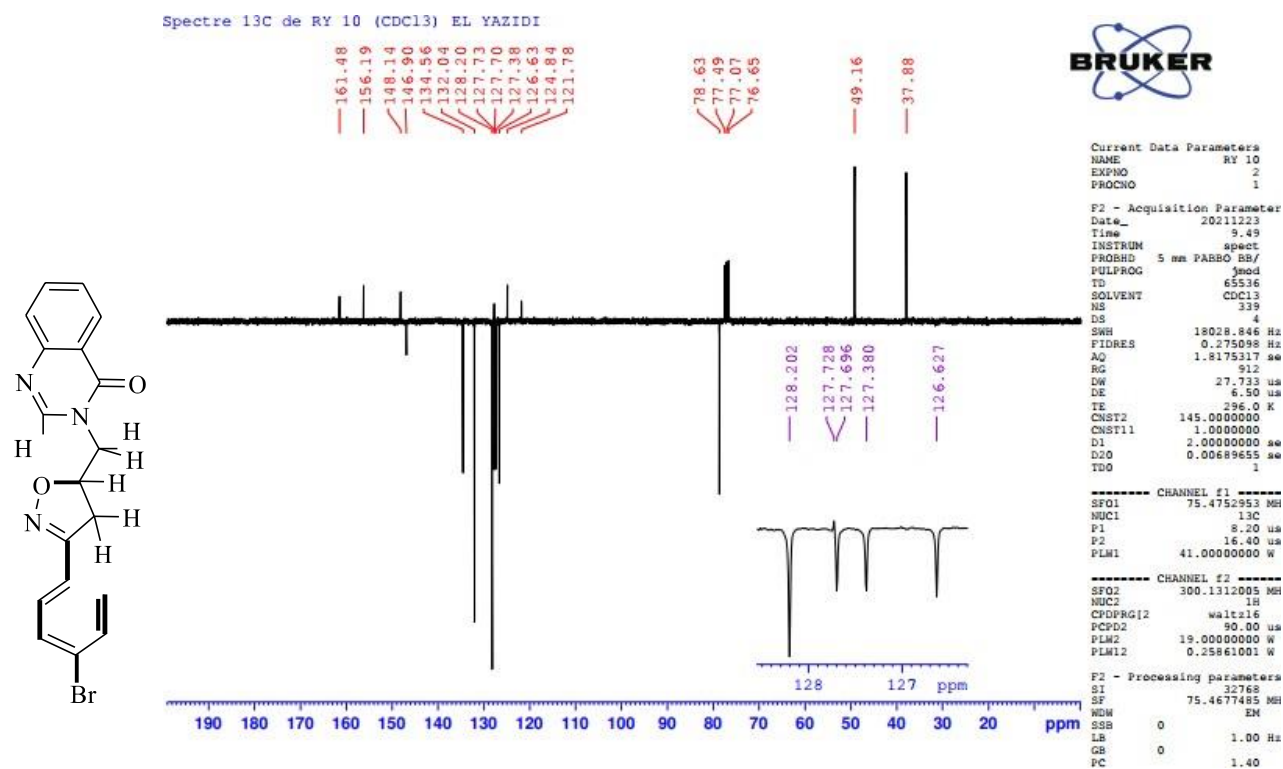

**Figure S7.**  $^{13}\text{C}$  NMR spectrum (75 MHz,  $\text{CDCl}_3$ ) of compound (4a)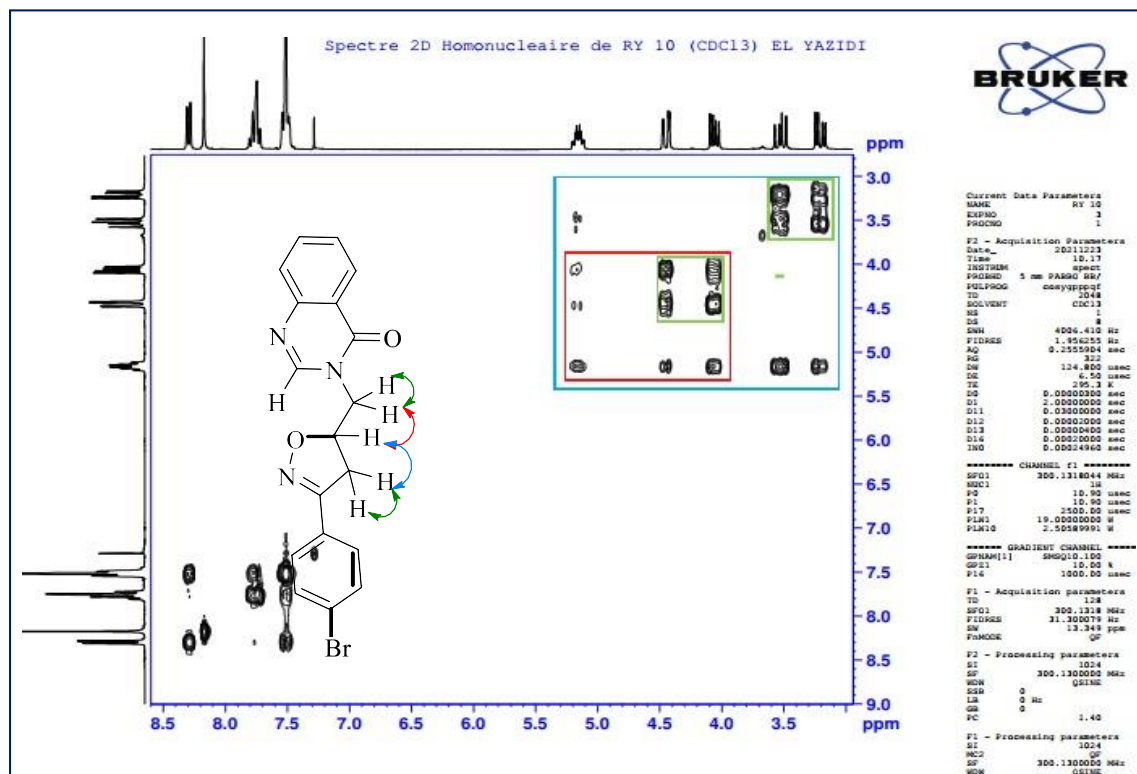



**Figure S9.** 2D-HSQC NMR spectrum of compound **4a** showing the identification of methine **C5** and methylene **C4** carbons of isoxazoline, exocyclic methylene carbon **CH<sub>2</sub>** and **CH** of quinazolinone.

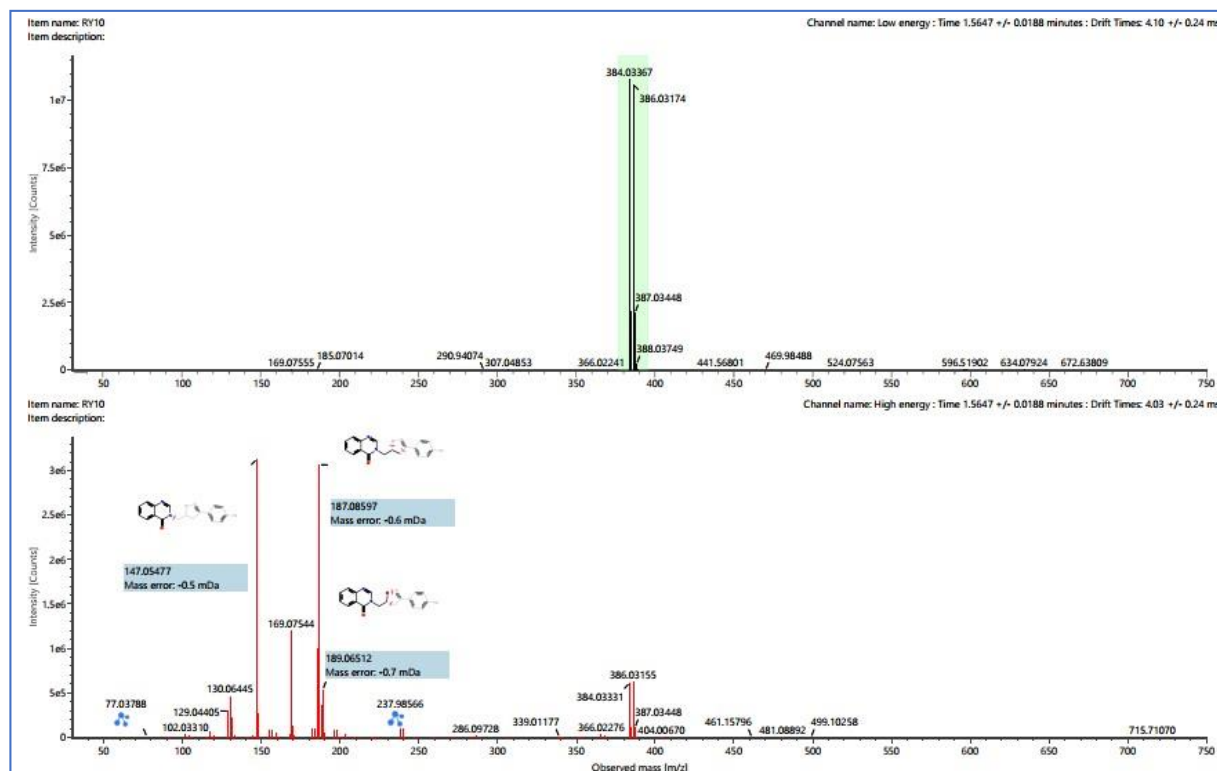

**Figure S10.** Mass spectrum of compound (**4a**)



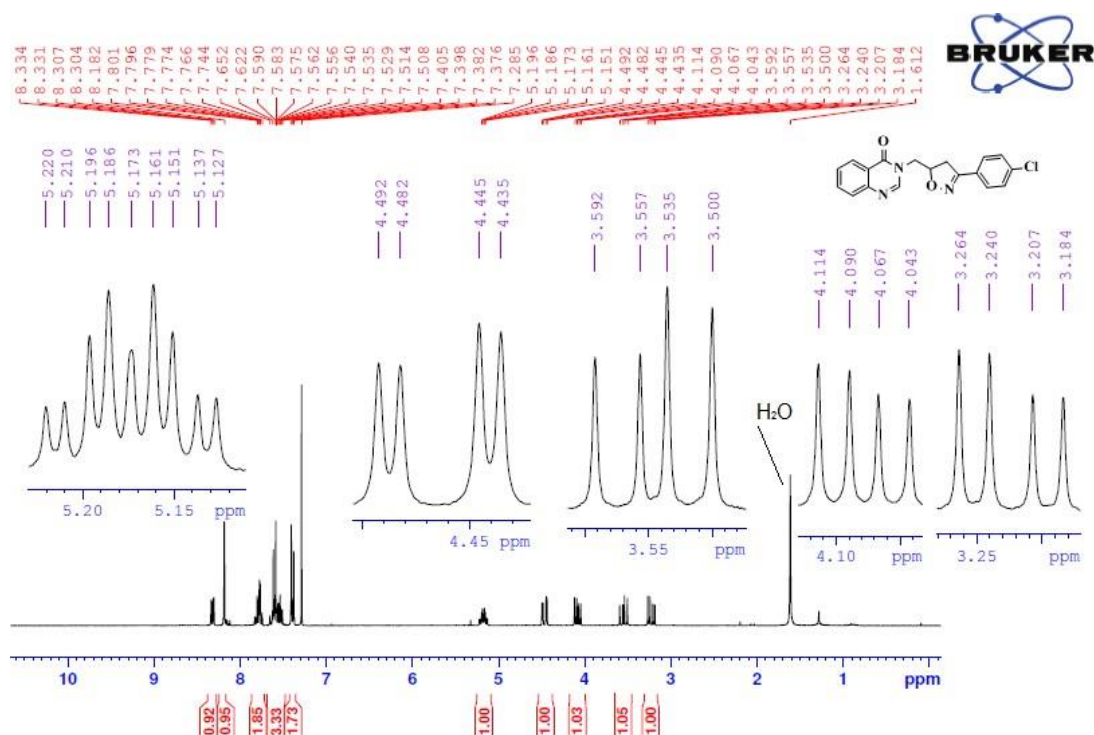

**Figure S11.** <sup>1</sup>H NMR spectrum (300 MHz, CDCl<sub>3</sub>) of compound (**4b**)

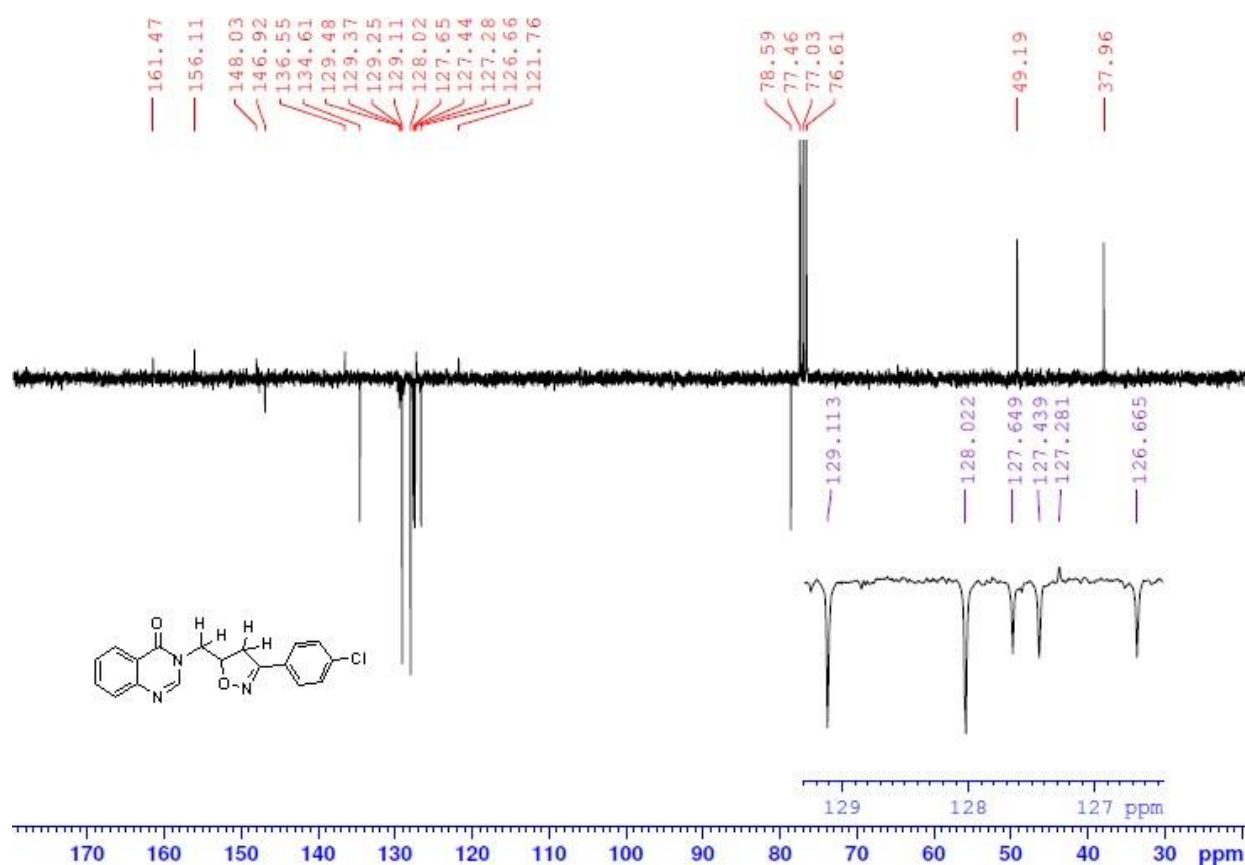

**Figure S12.** <sup>13</sup>C NMR spectrum (75 MHz, CDCl<sub>3</sub>) of compound (4b)

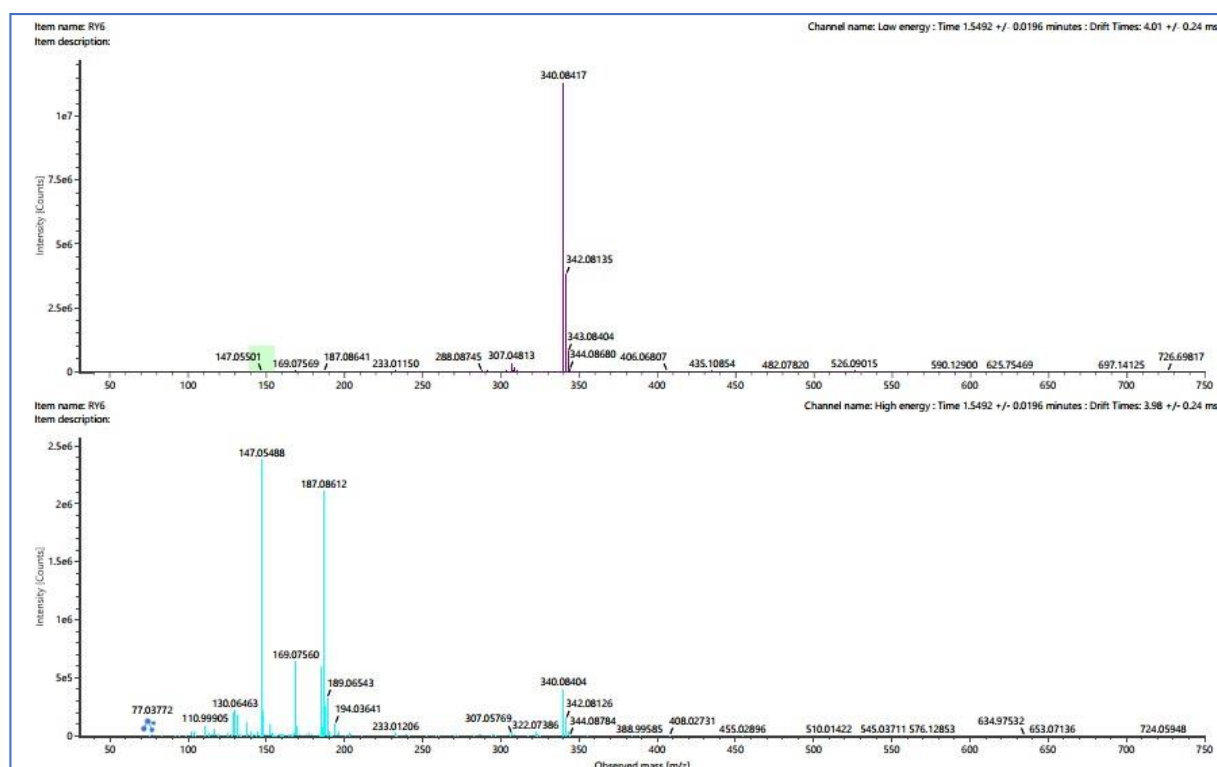

Figure S13. Mass spectrum of compound (4b)

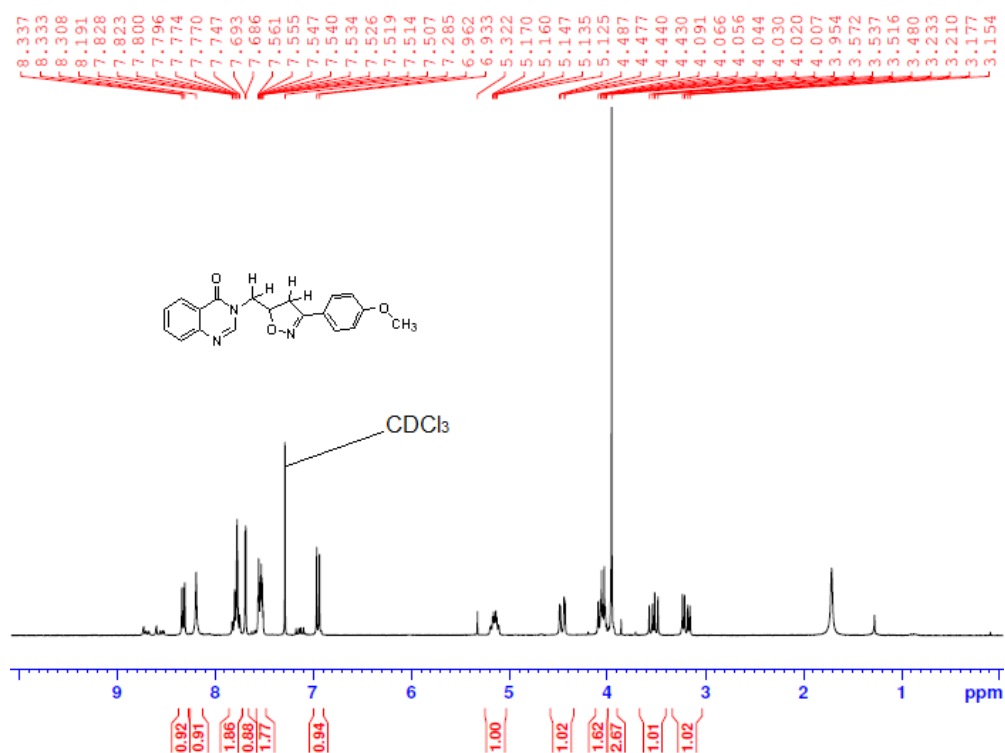

Figure S14. <sup>1</sup>H NMR spectrum (300 MHz, CDCl<sub>3</sub>) of compound (4c)

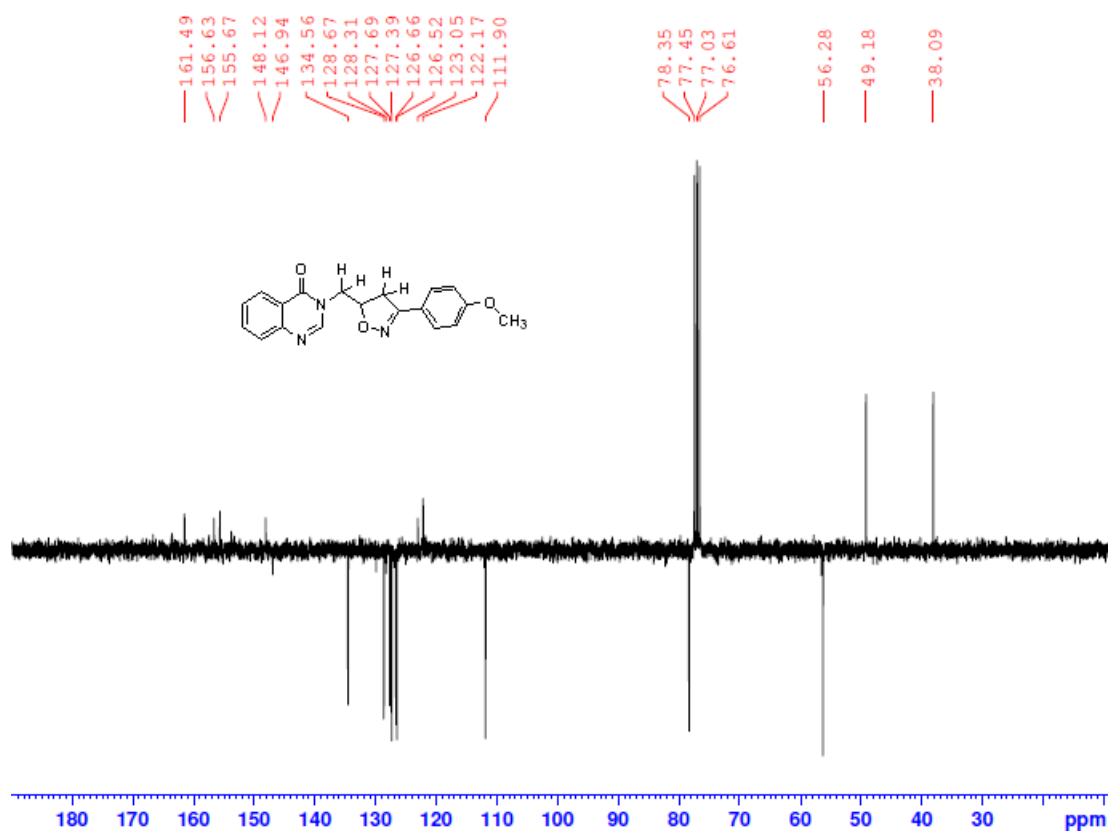

**Figure S15.** <sup>13</sup>C NMR spectrum (75 MHz, CDCl<sub>3</sub>) of compound (4c)

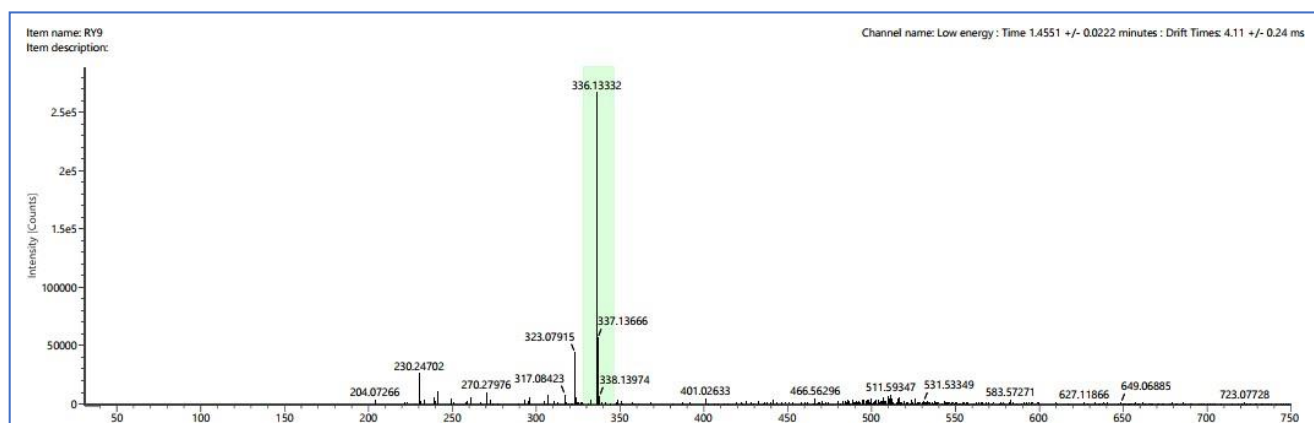

**Figure S 16.** Mass spectrum of compound (4c)

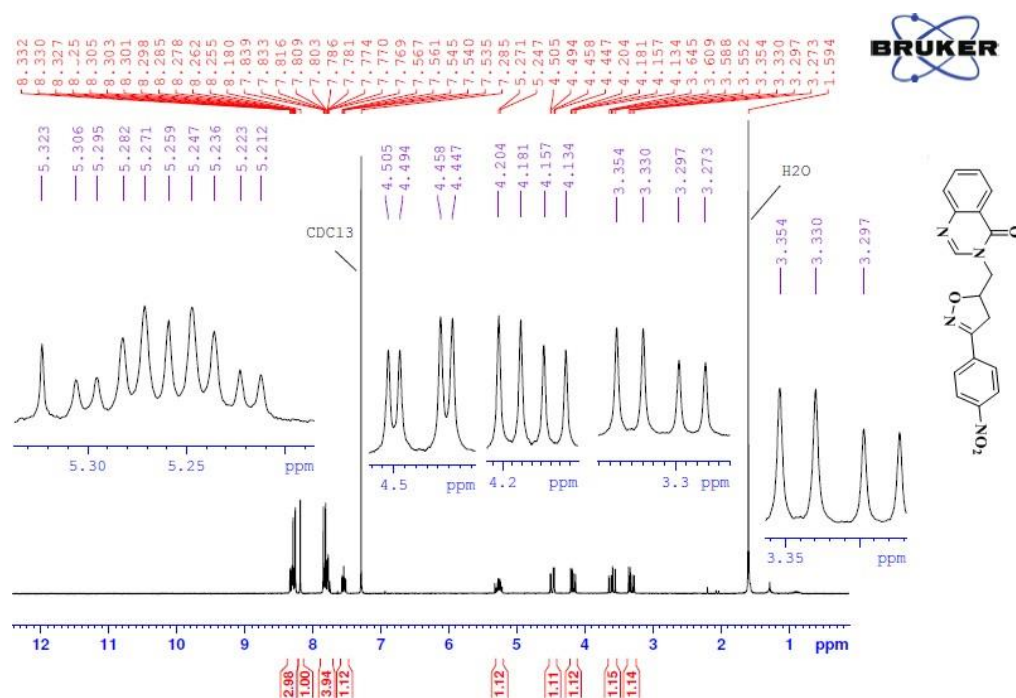

**Figure S17.** <sup>1</sup>H NMR spectrum (300 MHz, CDCl<sub>3</sub>) of compound (4d)

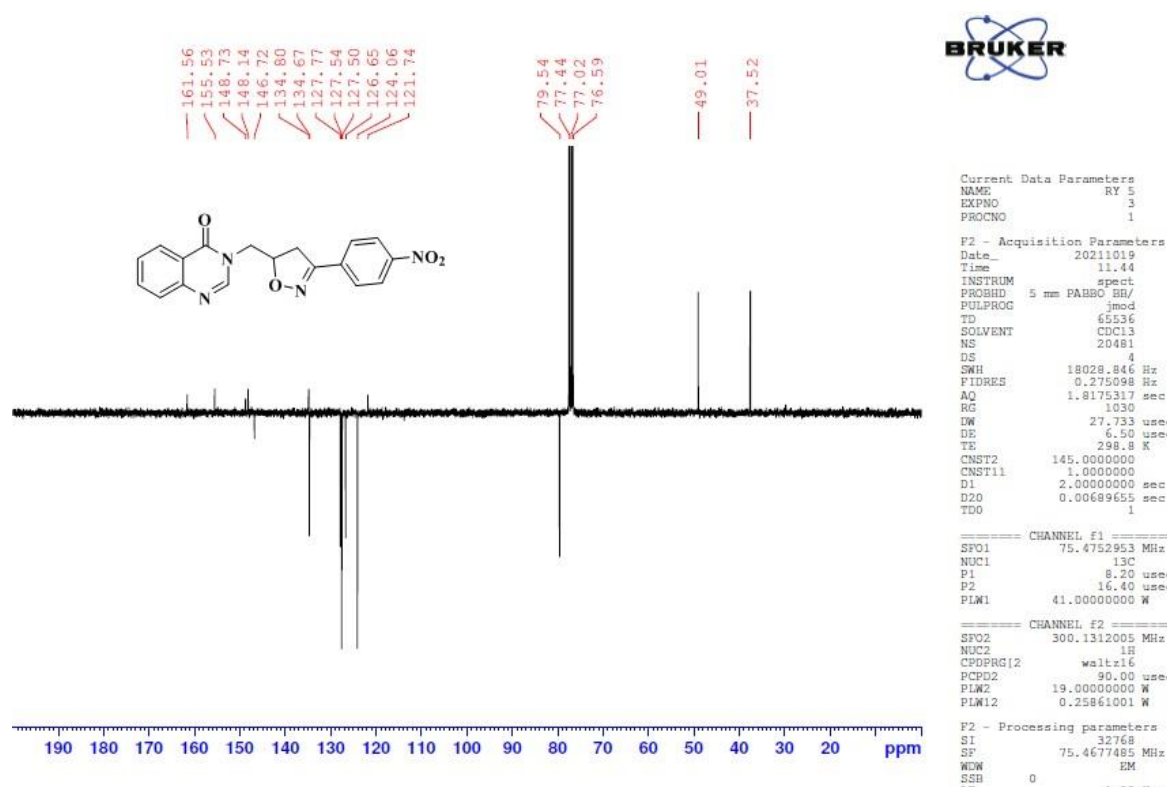

**Figure S18.**  $^{13}\text{C}$  NMR spectrum (75 MHz,  $\text{CDCl}_3$ ) of compound (4d)

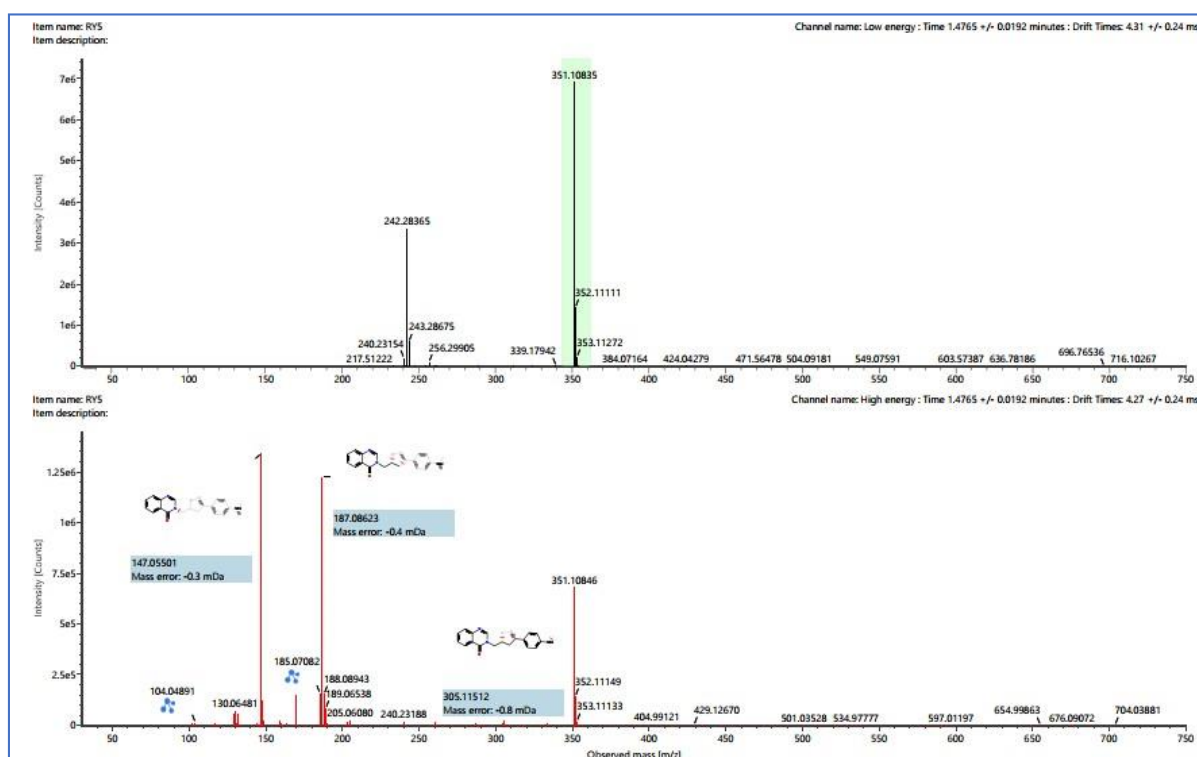

**Figure S19.** Mass spectrum of compound (**4d**)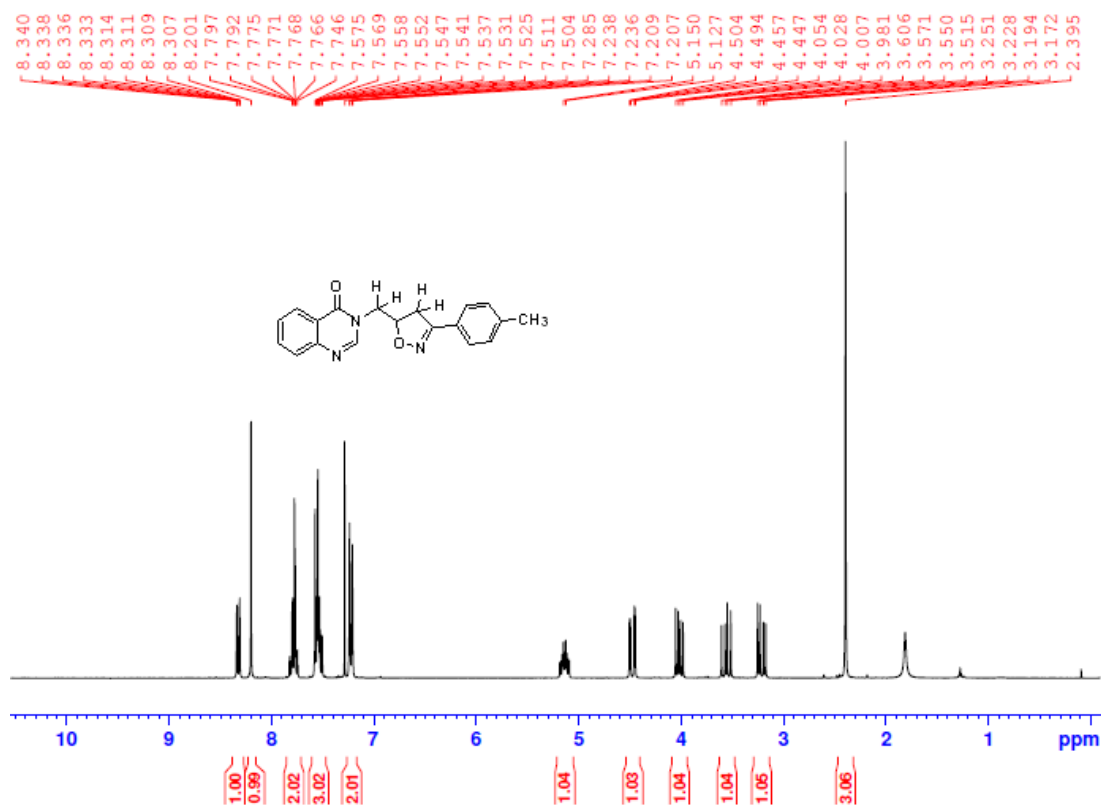**Figure S20.** <sup>1</sup>H NMR spectrum (300 MHz, CDCl<sub>3</sub>) of compound (**4e**)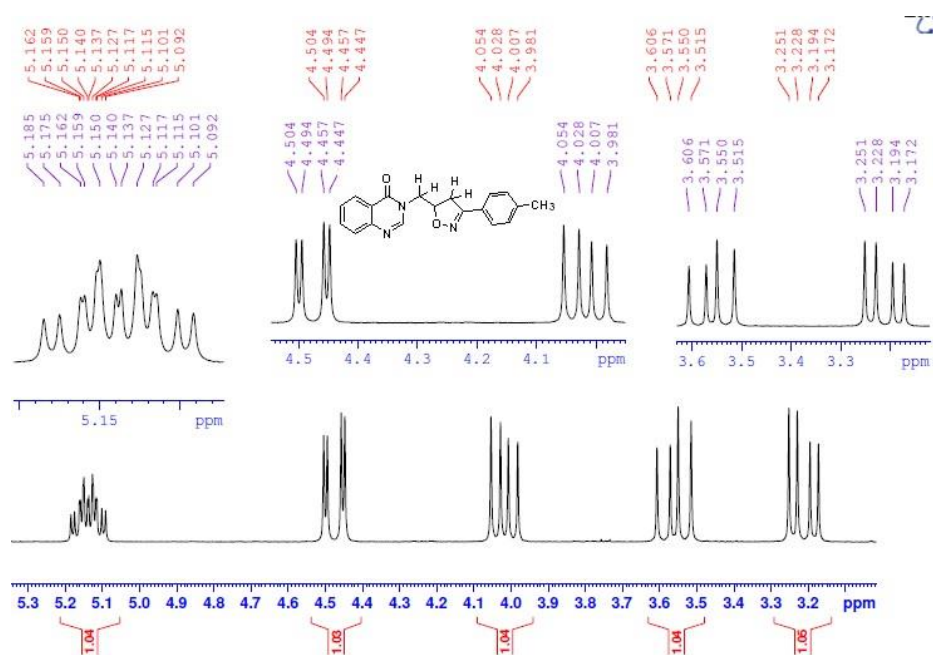



**Figure S21.** Aliphatic enlarged region of  $^1\text{H}$  NMR spectrum of compound (4e)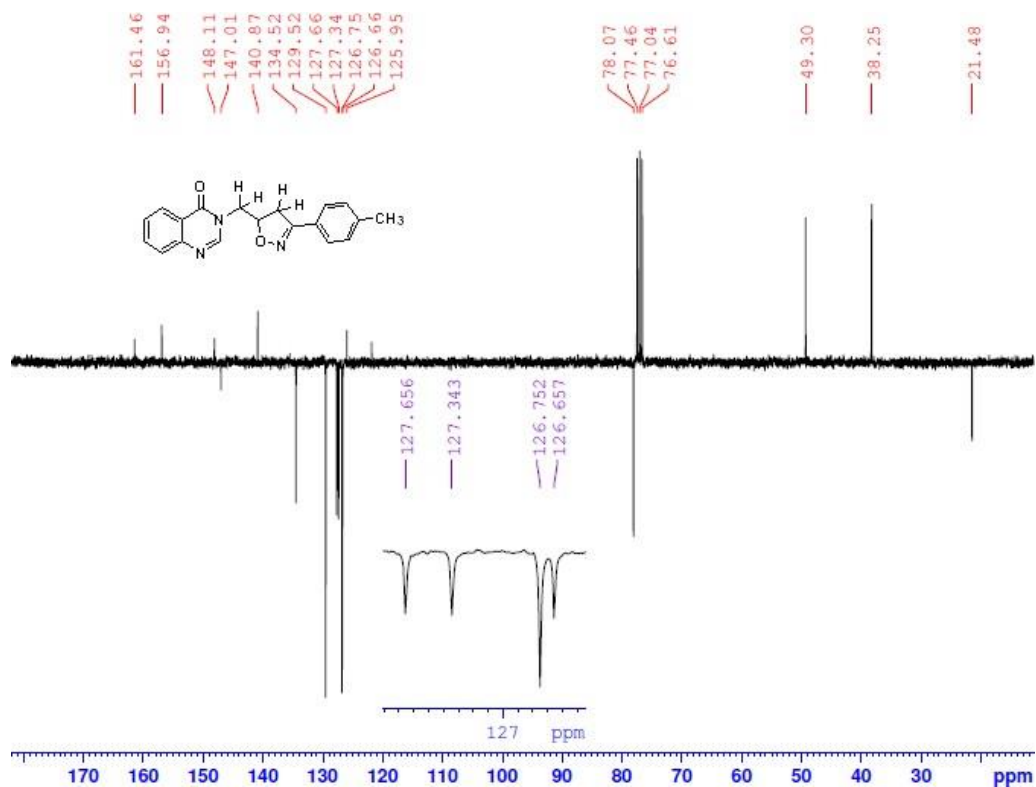**Figure S22.**  $^{13}\text{C}$  NMR spectrum (75 MHz,  $\text{CDCl}_3$ ) of compound (4e)

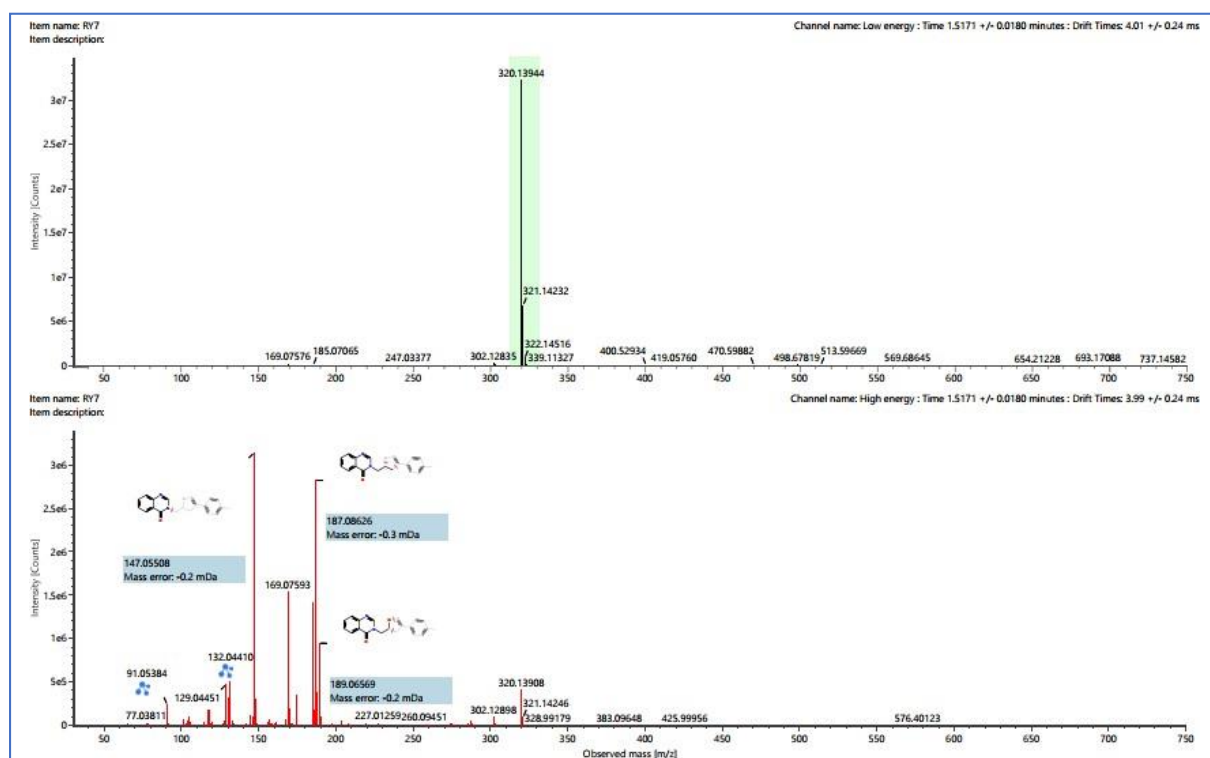

Figure S23. Mass spectrum of compound (4e)

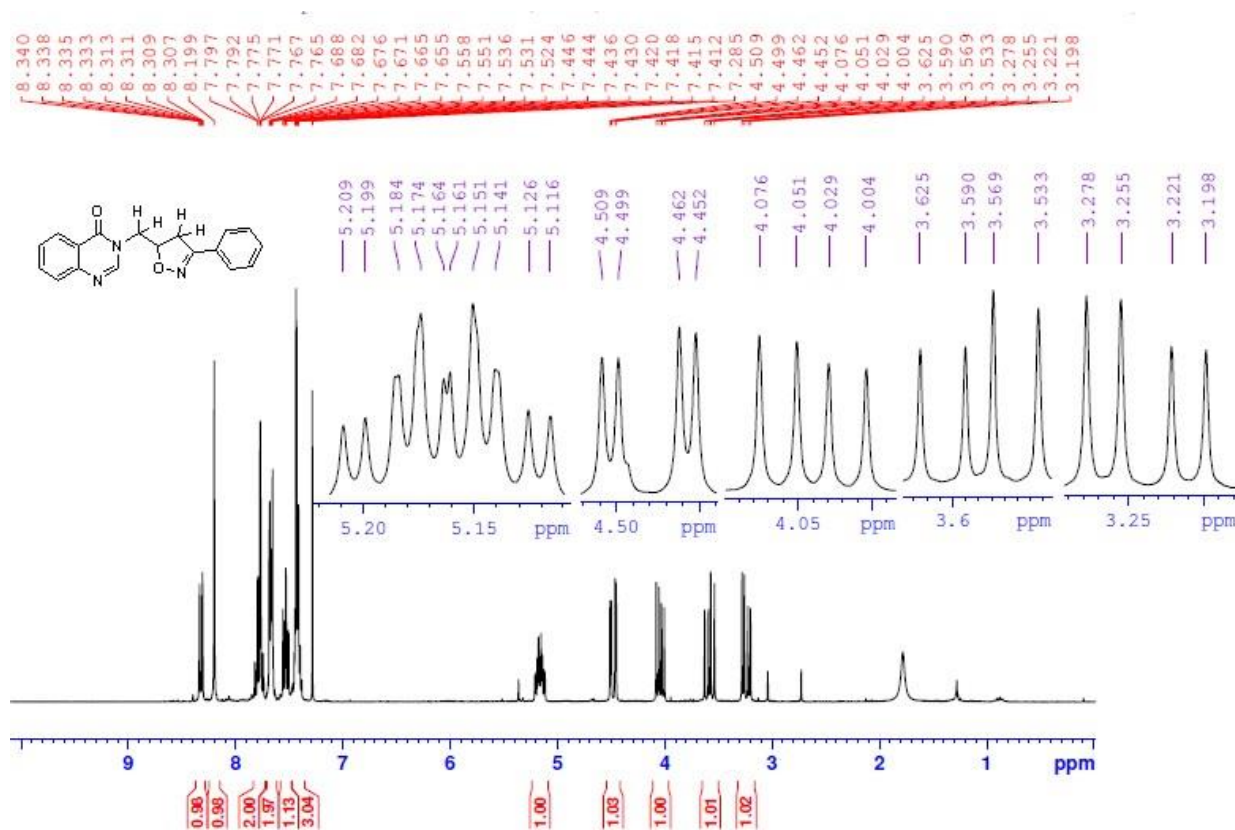

**Figure S24.**  $^1\text{H}$  NMR spectrum (300 MHz,  $\text{CDCl}_3$ ) of compound (**4f**)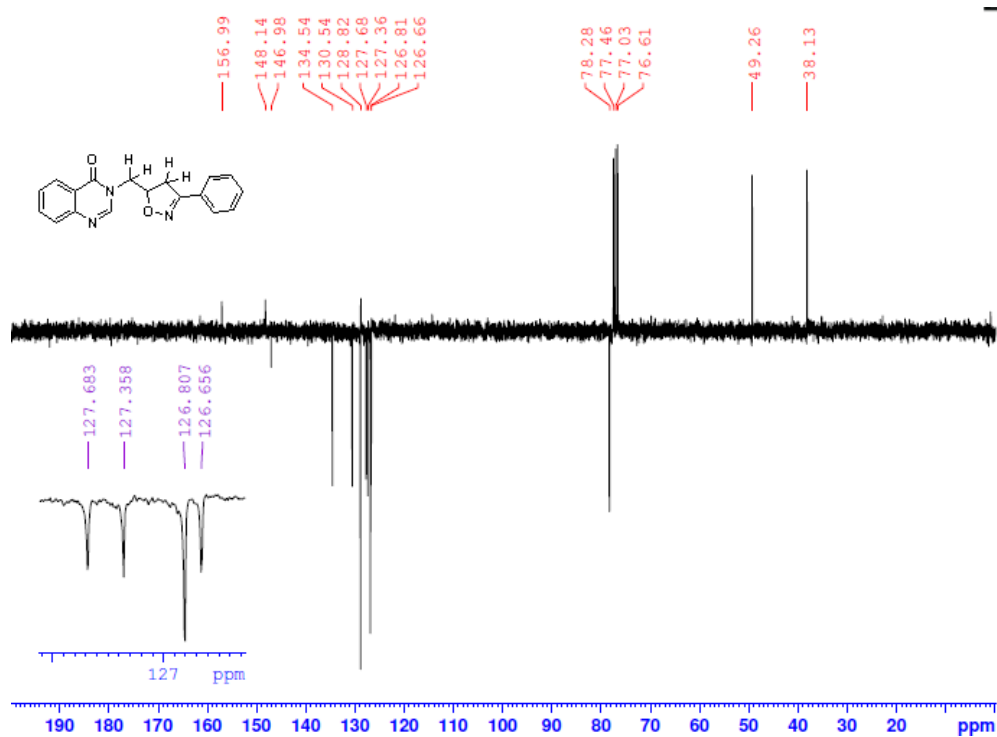**Figure S25.**  $^{13}\text{C}$  NMR spectrum (75 MHz,  $\text{CDCl}_3$ ) of compound (**4f**)

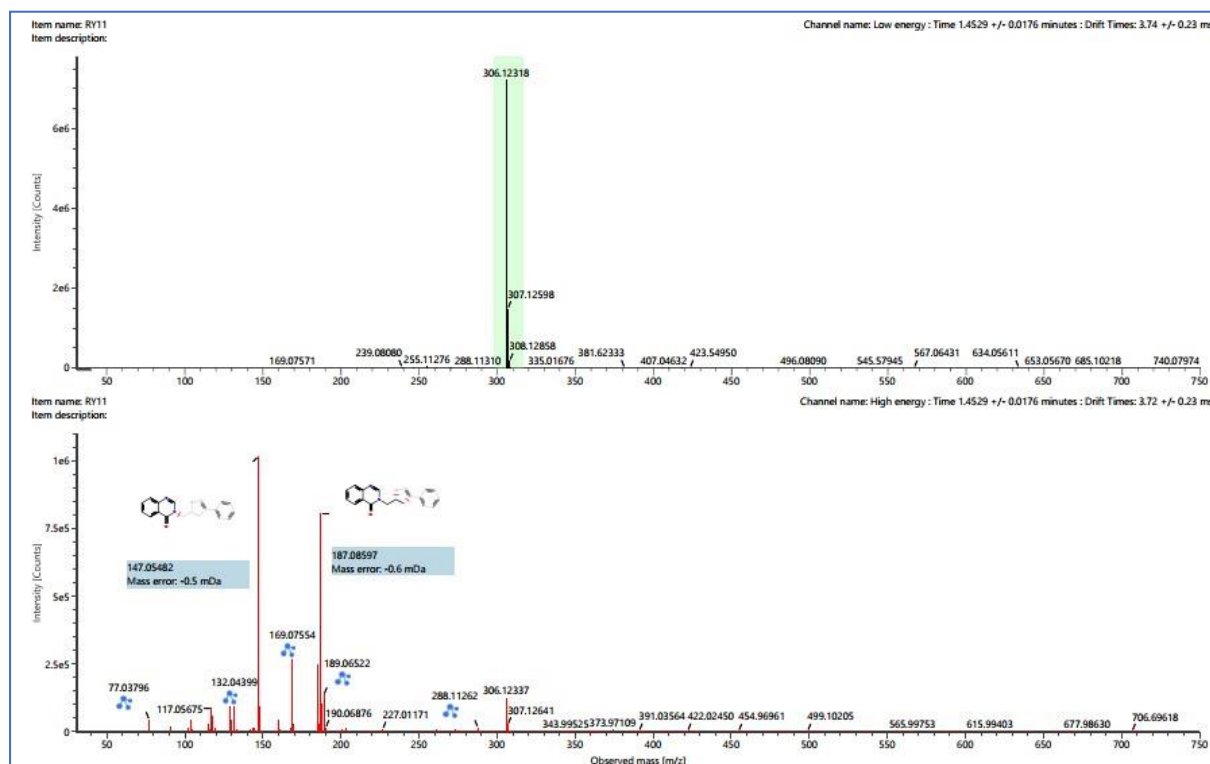

**Figure S26.** Mass spectrum of compound (**4f**)

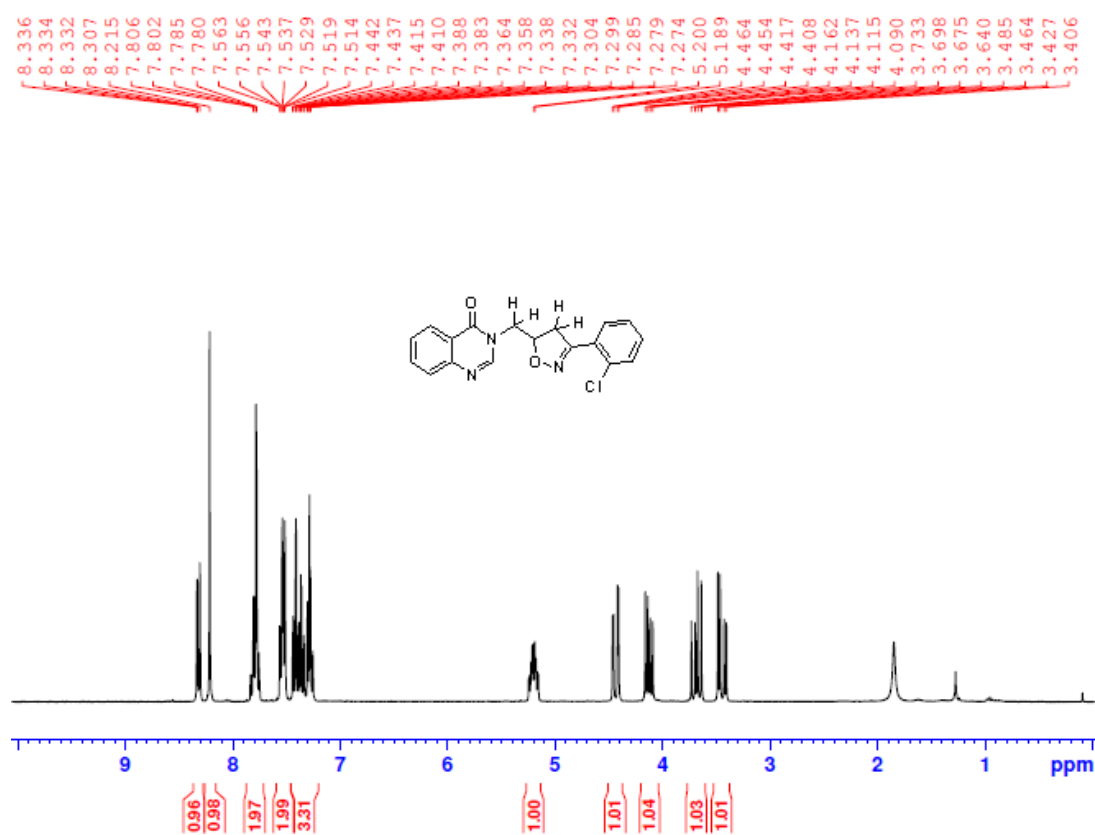

**Figure S27.** <sup>1</sup>H NMR spectrum (300 MHz, CDCl<sub>3</sub>) of compound (4g)

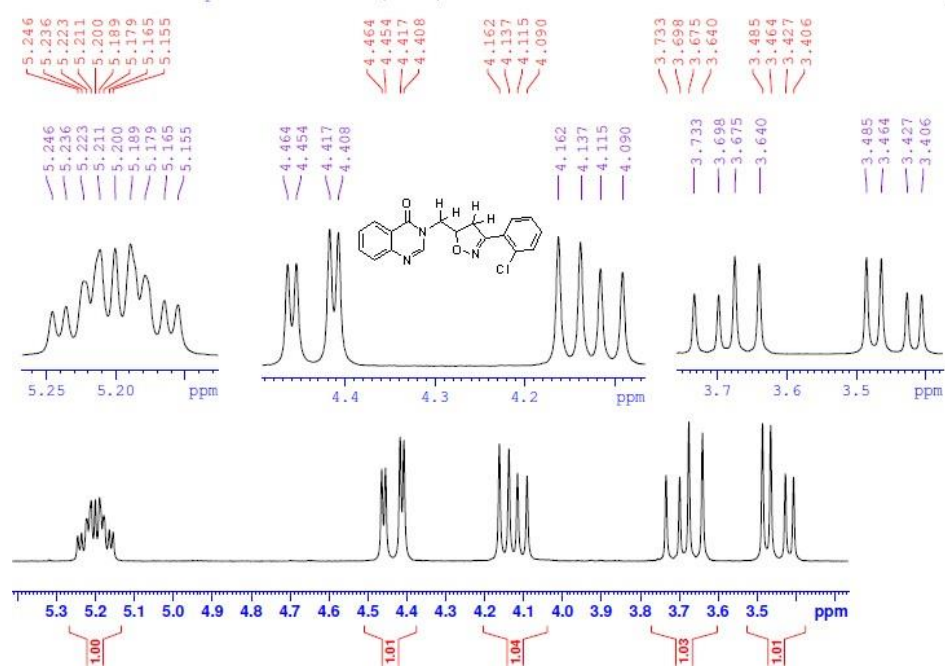

**Figure S28.** Aliphatic enlarged region of  $^1\text{H}$  NMR spectrum of compound (**4g**)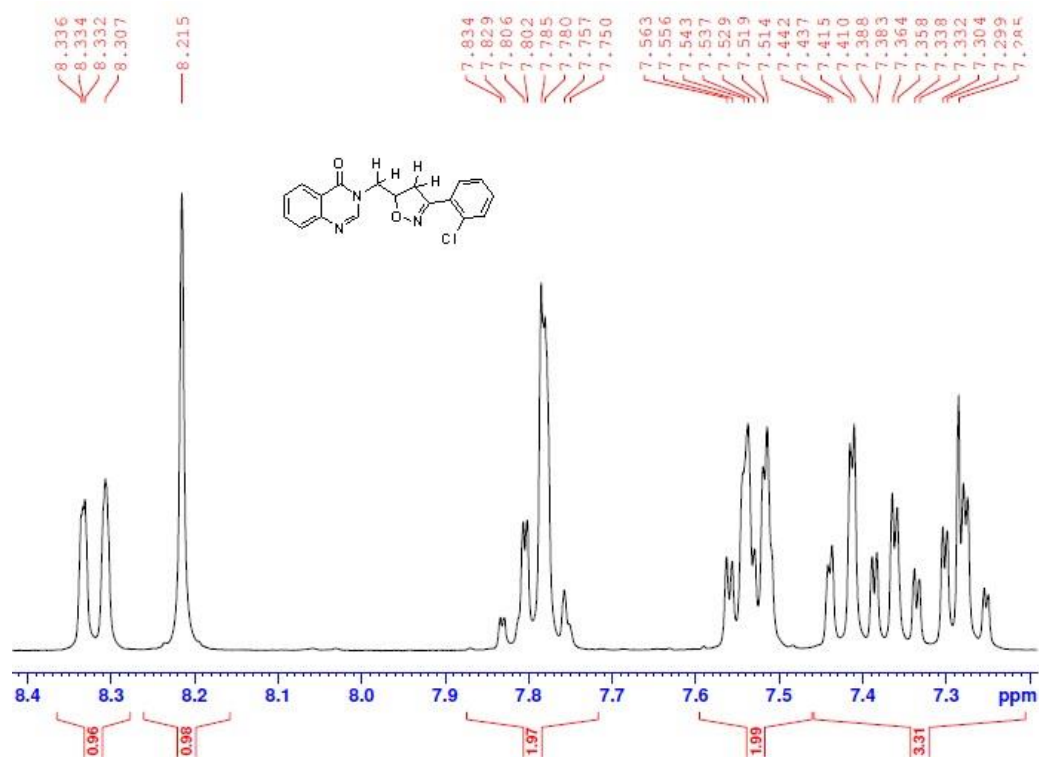**Figure S29.** Aromatic enlarged region of  $^1\text{H}$  NMR spectrum of compound (**4g**)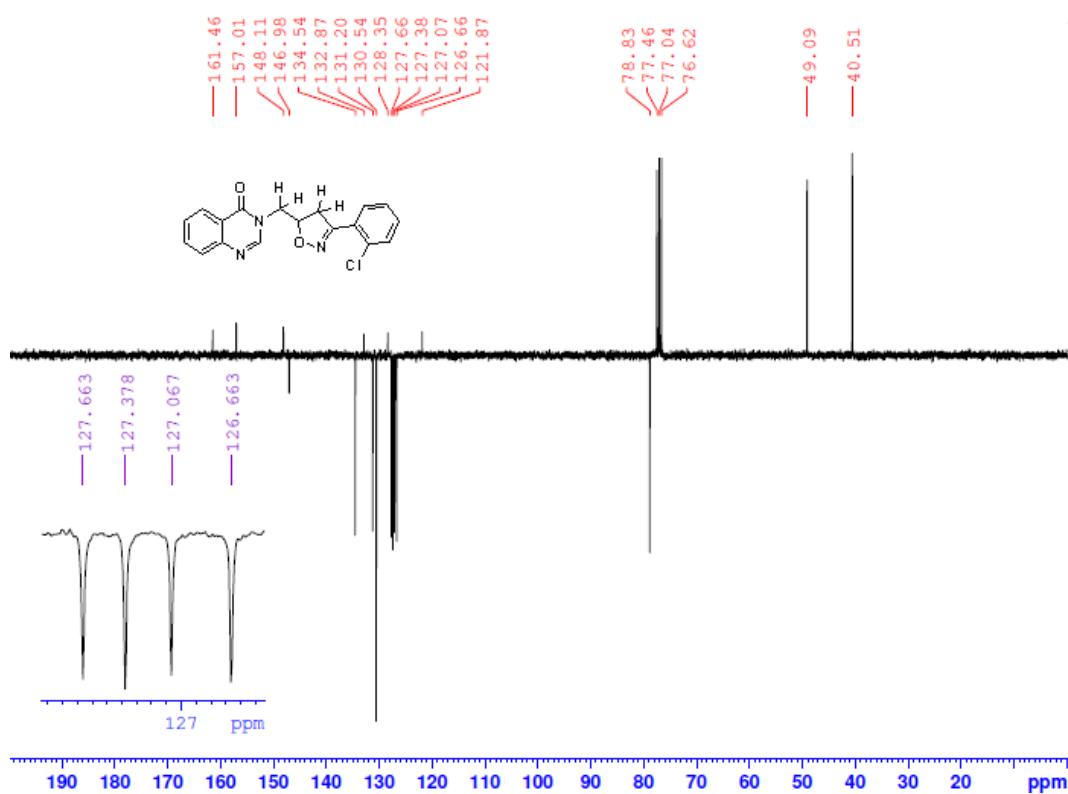

**Figure S30.**  $^{13}\text{C}$  NMR spectrum (75 MHz,  $\text{CDCl}_3$ ) of compound (**4g**)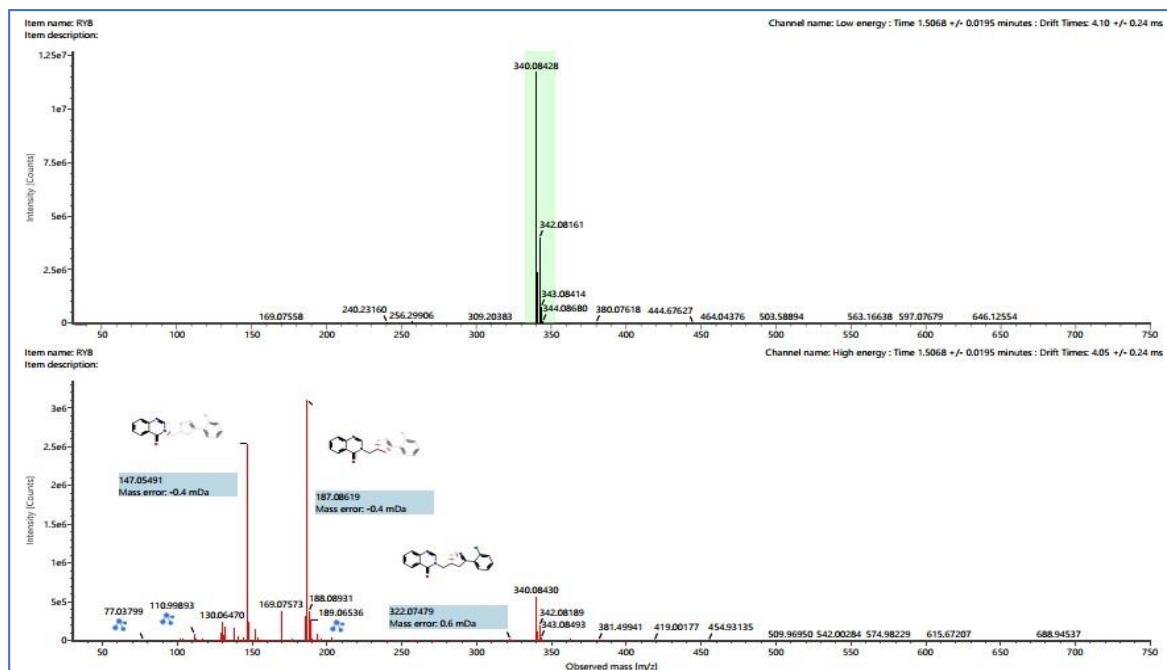**Figure S31.** Mass spectrum of compound (**4g**)
